# Supplementary material for: Prognostic Value of CTA-Derived Left Ventricular Mass in Neonates with Congenital Heart Disease
Source: MDPI journal article supplement (doi:10.3390/diagnostics11071215), 2021-07-06
Supplement: s1 [file s1]

**Supplementary Table S1:** Multiple comparisons of LVM with respect to different groups of congenital heart diseases.

| Dunn's multiple comparisons test | Adjusted p Value |
|----------------------------------|------------------|
| NAD vs. HLH                      | < 0.0001         |
| NAD vs. TOF                      | > 0.9999         |
| NAD vs. LVOTO                    | > 0.9999         |
| NAD vs. RVOTO                    | 0.9404           |
| NAD vs. TGA                      | > 0.9999         |
| NAD vs. PTA                      | > 0.9999         |
| NAD vs. PS/PA                    | > 0.9999         |
| NAD vs. DORV                     | > 0.9999         |
| NAD vs. SD                       | > 0.9999         |
| NAD vs. TAP                      | > 0.9999         |
| NAD vs. PDA                      | 0.4467           |
| NAD vs. Others                   | > 0.9999         |
| HLH vs. TOF                      | > 0.9999         |
| HLH vs. LVOTO                    | 0.0454           |
| HLH vs. RVOTO                    | 0.3385           |
| HLH vs. TGA                      | 0.0010           |
| HLH vs. PTA                      | 0.0036           |
| HLH vs. PS/PA                    | 0.0115           |
| HLH vs. DORV                     | 0.0368           |
| HLH vs. SD                       | 0.0005           |
| HLH vs. TAP                      | 0.0007           |
| HLH vs. PDA                      | 0.0190           |
| HLH vs. Others                   | 0.0082           |
| TOF vs. LVOTO                    | > 0.9999         |
| TOF vs. RVOTO                    | > 0.9999         |
| TOF vs. TGA                      | > 0.9999         |
| TOF vs. PTA                      | > 0.9999         |
| TOF vs. PS/PA                    | > 0.9999         |
| TOF vs. DORV                     | > 0.9999         |
| TOF vs. SD                       | > 0.9999         |
| TOF vs. TAP                      | > 0.9999         |
| TOF vs. PDA                      | > 0.9999         |
| TOF vs. Others                   | > 0.9999         |
| LVOTO vs. RVOTO                  | > 0.9999         |
| LVOTO vs. TGA                    | > 0.9999         |
| LVOTO vs. PTA                    | > 0.9999         |
| LVOTO vs. PS/PA                  | > 0.9999         |
| LVOTO vs. DORV                   | > 0.9999         |
| LVOTO vs. SD                     | > 0.9999         |
| LVOTO vs. TAP                    | > 0.9999         |
| LVOTO vs. PDA                    | > 0.9999         |
| LVOTO vs. Others                 | > 0.9999         |
| RVOTO vs. TGA                    | > 0.9999         |

|                  |          |
|------------------|----------|
| RVOTO vs. PTA    | > 0.9999 |
| RVOTO vs. PS/PA  | > 0.9999 |
| RVOTO vs. DORV   | > 0.9999 |
| RVOTO vs. SD     | > 0.9999 |
| RVOTO vs. TAP    | > 0.9999 |
| RVOTO vs. PDA    | > 0.9999 |
| RVOTO vs. Others | > 0.9999 |
| TGA vs. PTA      | > 0.9999 |
| TGA vs. PS/PA    | > 0.9999 |
| TGA vs. DORV     | > 0.9999 |
| TGA vs. SD       | > 0.9999 |
| TGA vs. TAP      | > 0.9999 |
| TGA vs. PDA      | > 0.9999 |
| TGA vs. Others   | > 0.9999 |
| PTA vs. PS/PA    | > 0.9999 |
| PTA vs. DORV     | > 0.9999 |
| PTA vs. SD       | > 0.9999 |
| PTA vs. TAP      | > 0.9999 |
| PTA vs. PDA      | > 0.9999 |
| PTA vs. Others   | > 0.9999 |
| PS/PA vs. DORV   | > 0.9999 |
| PS/PA vs. SD     | > 0.9999 |
| PS/PA vs. TAP    | > 0.9999 |
| PS/PA vs. PDA    | > 0.9999 |
| PS/PA vs. Others | > 0.9999 |
| DORV vs. SD      | > 0.9999 |
| DORV vs. TAP     | > 0.9999 |
| DORV vs. PDA     | > 0.9999 |
| DORV vs. Others  | > 0.9999 |
| SD vs. TAP       | > 0.9999 |
| SD vs. PDA       | > 0.9999 |
| SD vs. Others    | > 0.9999 |
| TAP vs. PDA      | > 0.9999 |
| TAP vs. Others   | > 0.9999 |
| PDA vs. Others   | > 0.9999 |

The table lists p values from an ANOVA with a post-hoc Dunn's test for multiple comparisons between patients with no applicable disease (NAD), hypoplastic left heart (HLH), Tetralogy of Fallot (TOF), left ventricular outflow tract obstruction (LVOTO), right ventricular outflow tract obstruction (RVOTO), transposition of the great arteries (TGA), Persistent truncus arteriosus (PTA), pulmonary stenoses or atresia (PS/PA), double outlet right ventricle (DORV), septal defects (SD), thoracic aortic pathologies (TAP), persistent ductus arteriosus (PDA), and others.

**Supplementary Table S2:** Diagnostic cross tables.

| LVM vs. surgical approach   | All patients  |                | HLH-subgroup  |                |
|-----------------------------|---------------|----------------|---------------|----------------|
|                             | Biventricular | Univentricular | Biventricular | Univentricular |
| LVM > 33.9 g/m <sup>2</sup> | 93            | 5              | 2             | 0              |
| LVM < 33.9 g/m <sup>2</sup> | 20            | 14             | 2             | 10             |

Cross tables listing the patients with an LVM above or below the threshold of 33.9 g/m<sup>2</sup> along with the received surgical management for the entire patient population and the subgroup of HLH patients.
